# Supplementary material for: Wernicke Encephalopathy Presenting with Dysphagia: A Case Report and Systematic Literature Review
Source: MDPI journal article supplement (doi:10.3390/nu14245294), 2022-12-13
Supplement: s1 [file s1]

Supplementary Material Table S1. Laboratory serum tests.

| Laboratory test                                  | Result   | Normal range                     |
|--------------------------------------------------|----------|----------------------------------|
| Leukocytes                                       | 10.800   | 4.0-9.5 / $\mu$ L                |
| Lymphocytes                                      | 34.3%    | 20-40%                           |
| Granulocytes                                     | 63.5%    | 45-70%                           |
| Monocytes                                        | 2.2%     | 3.5-9.5%                         |
| Erythrocytes                                     | 4.58     | 4-5.5 x10 <sup>6</sup> / $\mu$ L |
| Hemoglobin                                       | 27.5     | 27-32 pg                         |
| Thrombocytes                                     | 379      | 379 x 10 <sup>3</sup> / $\mu$ L  |
| Creatinine                                       | 0.7      | 0.7-1.2 mg/dl                    |
| Urea                                             | 13       | 15-36 mg/dl                      |
| Uric acid                                        | 2.2      | 2.5-6.2 mg/dl                    |
| Sodium                                           | 140      | 135-145 mmol/l                   |
| Potassium                                        | 5.4      | 3.5-5.1 mmol/l                   |
| ALT                                              | 9        | 0-35 U/L                         |
| AST                                              | 18       | 14-36 U/L                        |
| GGT                                              | 21       | 12-43 U/L                        |
| Triglycerides                                    | 73       | 0-200 mg/dl                      |
| Cholesterol (total)                              | 227      | 150-200 mg/dl                    |
| LDL cholesterol                                  | 148      | 0-150 mg/dl                      |
| HDL cholesterol                                  | 65       | 40-150 mg/dl                     |
| Bilirubin                                        | 0.4      | 0.2-1.3 mg/dl                    |
| Glycemia                                         | 111      | 74-106 mg/dl                     |
| Proteins                                         | 6.7      | 6.4-8.2 g/dl                     |
| Albumin                                          | 3.0      | 3.4-5.0 g/dl                     |
| CK                                               | 47       | 30-135 U/L                       |
| CK-MB                                            | 9        | 0-16 U/L                         |
| LDH                                              | 145      | 120-246 U/L                      |
| Erythrocyte sedimentation rate                   | 45       | 2-20 mm/1 h                      |
| C reactive protein                               | 28       | 0-10 mg/l                        |
| Fibrinogen                                       | 478      | 200-393 mg/dl                    |
| Rheumatoid factor                                | 9.38     | 0-15.9 U/ml                      |
| Interleukin 6                                    | 3.75     | 0-6.65 pg/ml                     |
| Procalcitonin                                    | 0.036    | <0.5 ng/mL                       |
| TSH                                              | 0.165    | 0.55-4.78 mU/L                   |
| FT3                                              | 5.1      | 3.54-6.47 pmol/l                 |
| FT4                                              | 15.75    | 11.5-22.7 pmol/l                 |
| Antithyroglobulin antibodies                     | <1.3     | 0-4.5 U/ml                       |
| Thyroid peroxidase antibodies                    | 28       | 0-60 U/ml                        |
| Vitamin D                                        | 25.17    | 30-100 ng/ml                     |
| HIV test                                         | Negative | Negative                         |
| Ferritin                                         | 103      | 4.5-170                          |
| Anti-streptolysin O antibodies                   | 81       | 0-408 U/ml                       |
| Venereal disease research laboratory (VDRL) test | Negative | Negative                         |
